# Supplementary material
Source: Springer Nature journal article supplement (https://www.springermedizin.de/resource/supplementary/12959_2011_152_MOESM4_ESM.pdf/9569184)
Supplement: MOESM4 [file 9569184]

A

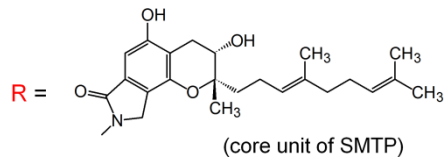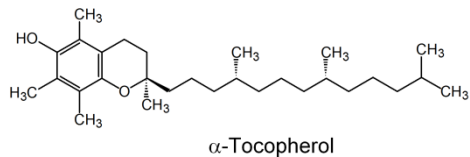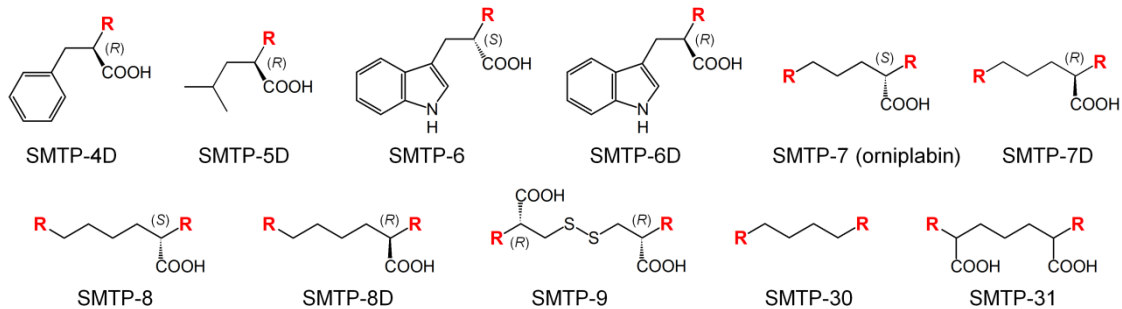

B

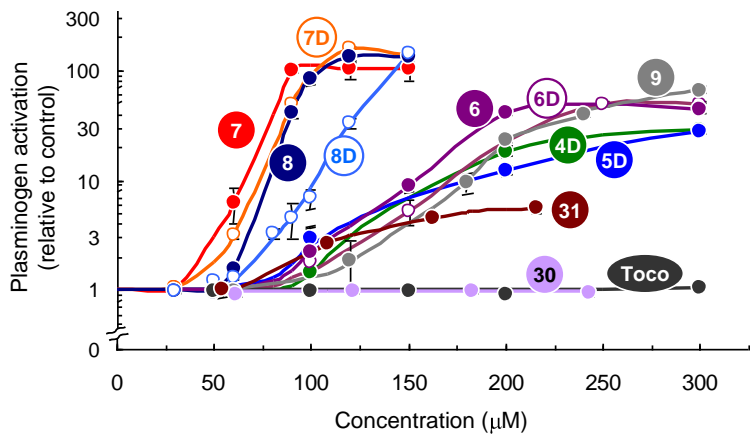

| Compound             | EC <sub>10</sub> ( $\mu\text{M}$ ) | E <sub>max</sub> (fold) | Potency (E <sub>max</sub> /EC <sub>10</sub> , fold $\mu\text{M}^{-1}$ ) |
|----------------------|------------------------------------|-------------------------|-------------------------------------------------------------------------|
| SMTP-4D              | 167                                | 29                      | 0.17                                                                    |
| SMTP-5D              | 181                                | 28                      | 0.16                                                                    |
| SMTP-6               | 153                                | 44                      | 0.29                                                                    |
| SMTP-6D              | 171                                | 49                      | 0.28                                                                    |
| SMTP-7               | 65                                 | 102                     | 1.57                                                                    |
| SMTP-7D              | 74                                 | 156                     | 2.11                                                                    |
| SMTP-8               | 78                                 | 133                     | 1.71                                                                    |
| SMTP-8D              | 102                                | 140                     | 1.37                                                                    |
| SMTP-9               | 179                                | 66                      | 0.37                                                                    |
| SMTP-30              | NA                                 | 1                       | 0                                                                       |
| SMTP-31              | NA                                 | 6                       | 0                                                                       |
| $\alpha$ -Tocopherol | NA                                 | 1                       | 0                                                                       |
